# Supplementary material
Source: PubMed Central journal article supplement (PMC2613551)

# Figure S1: Normal spleen

## GSE1456: Overall Survival

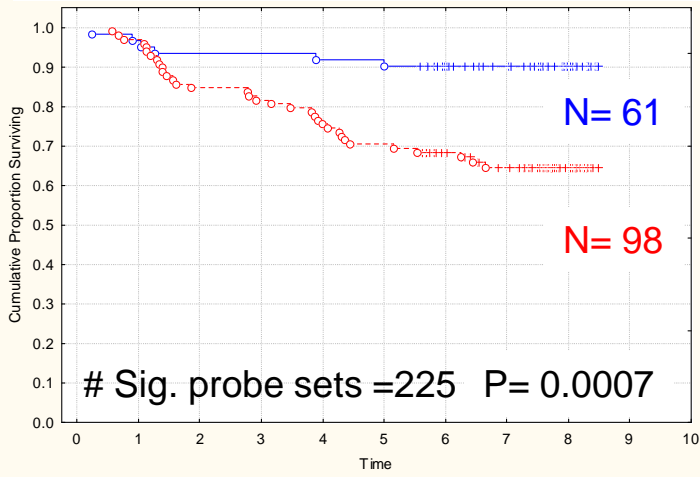

## GSE2034: Distant Metastasis-free Survival

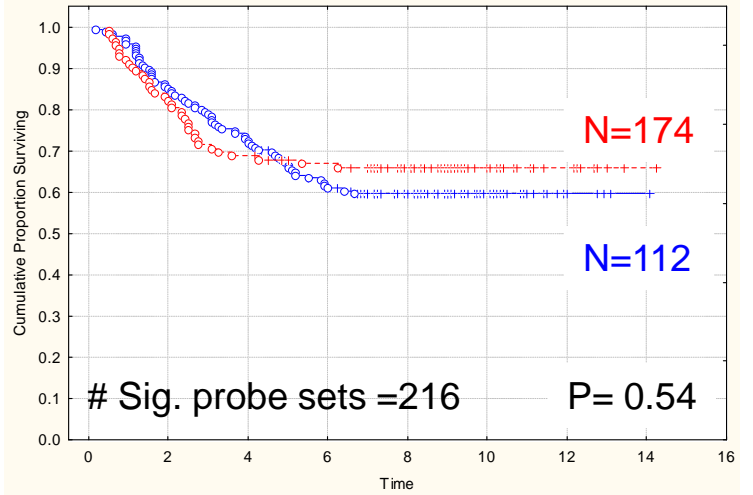

## GSE3494 : Overall Survival

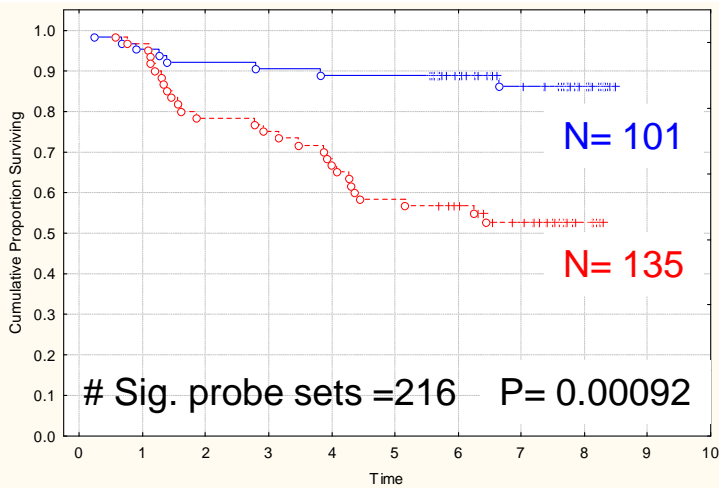

## GSE4922: Disease-free Survival

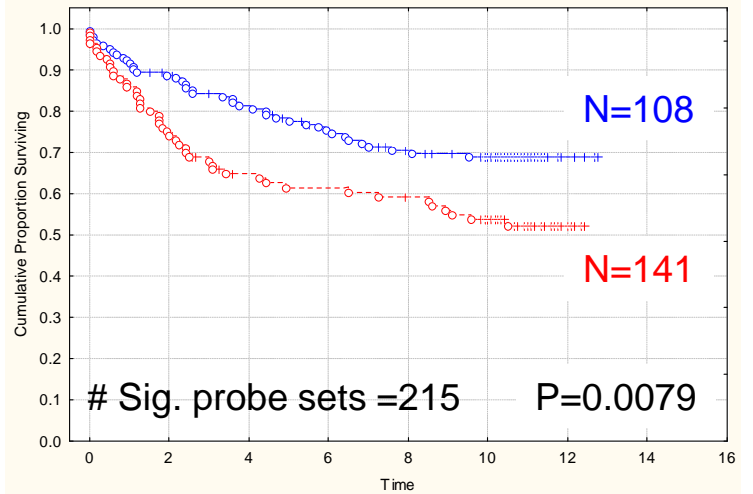

## Rosetta: Metastasis-free survival

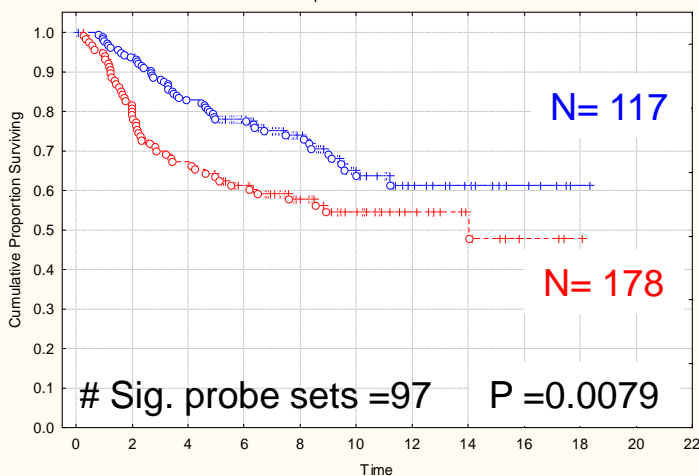

# Figure S2: Normal Thymus

## GSE1456: Overall Survival

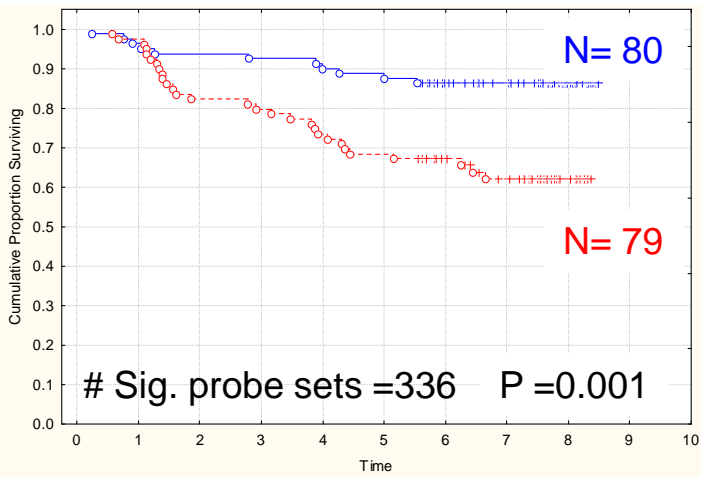

## GSE2034: Distant Metastasis-free Survival

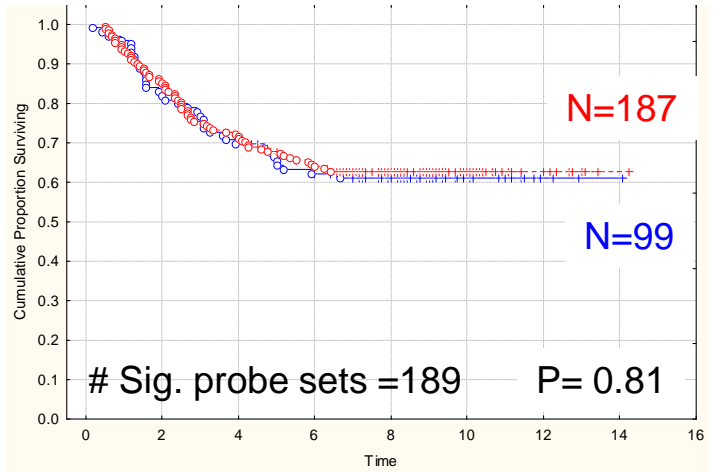

## GSE3494 : Overall Survival

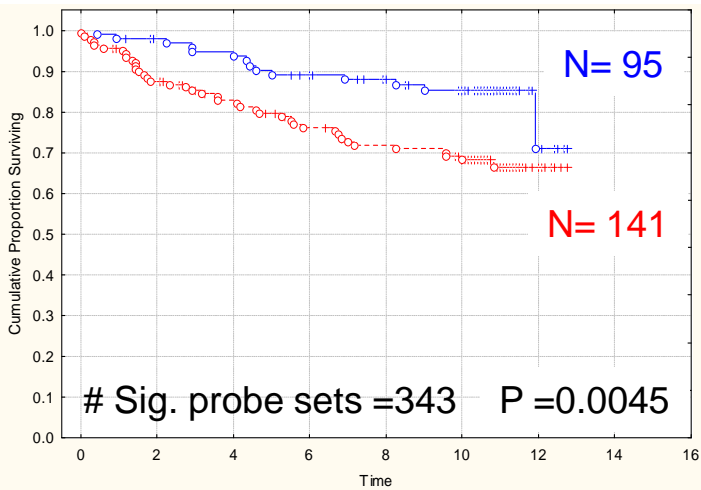

## GSE4922: Disease-free Survival

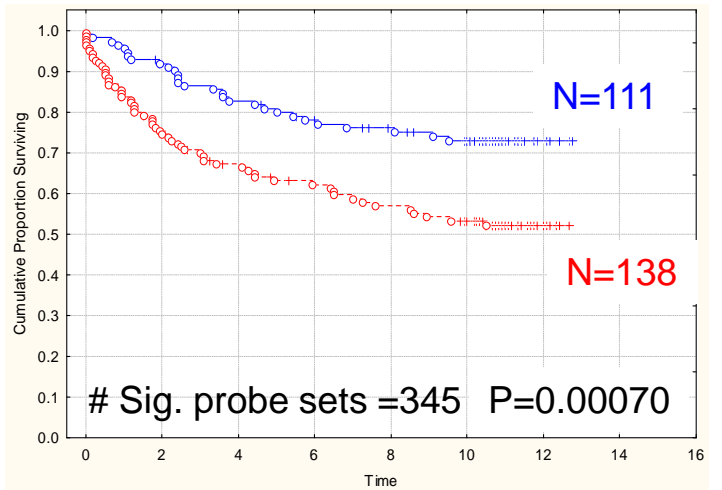

## Rosetta: Metastasis-free survival

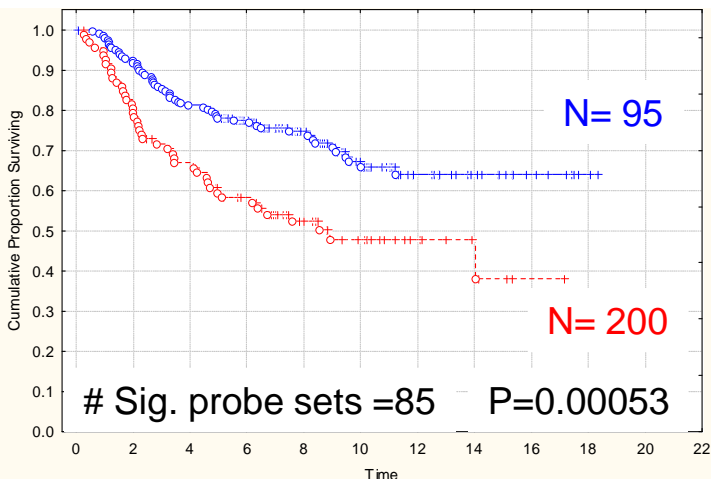

# Figure S3: Whole blood

## GSE1456: Overall Survival

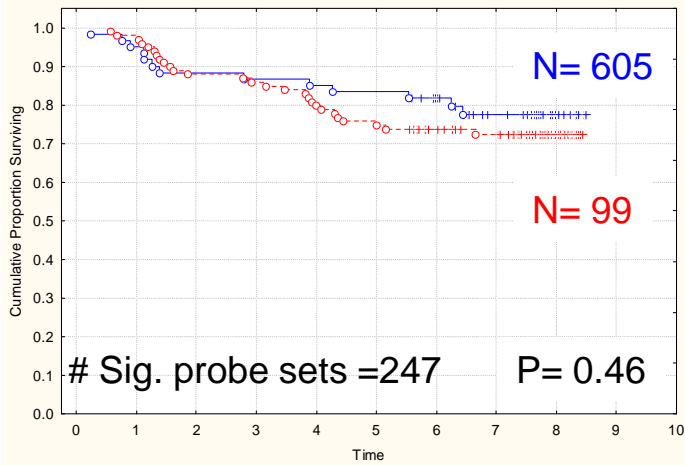

## GSE2034: Distant Metastasis-free Survival

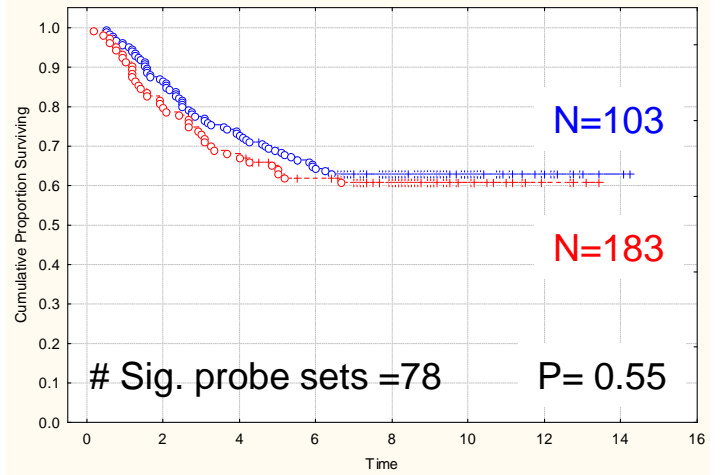

## GSE3494 : Overall Survival

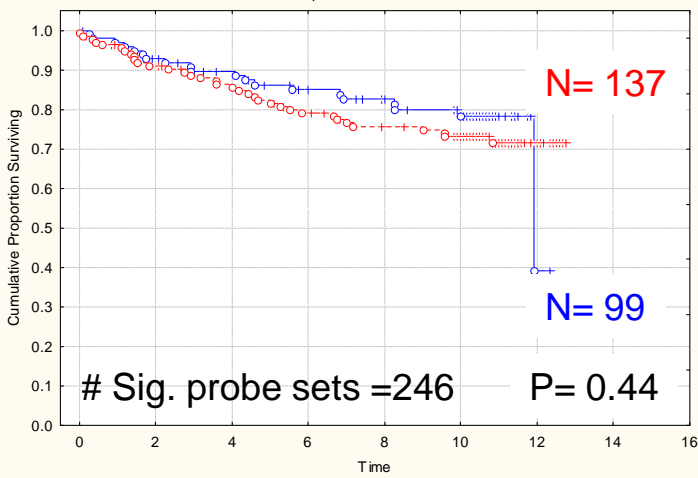

## GSE4922: Disease-free Survival

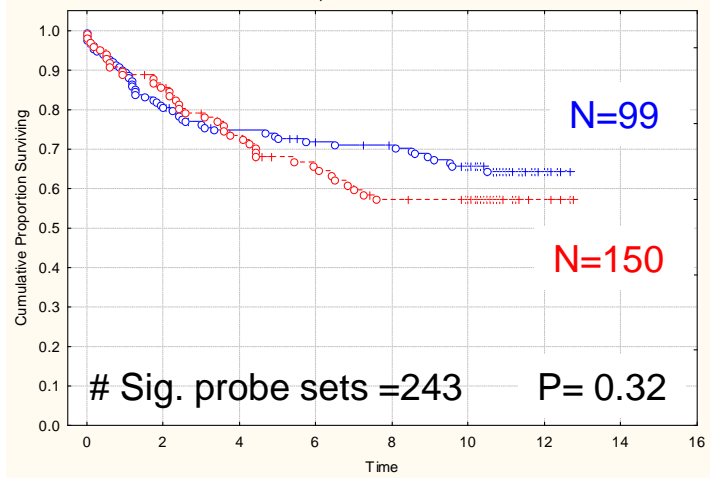

## Rosetta: Metastasis-free survival

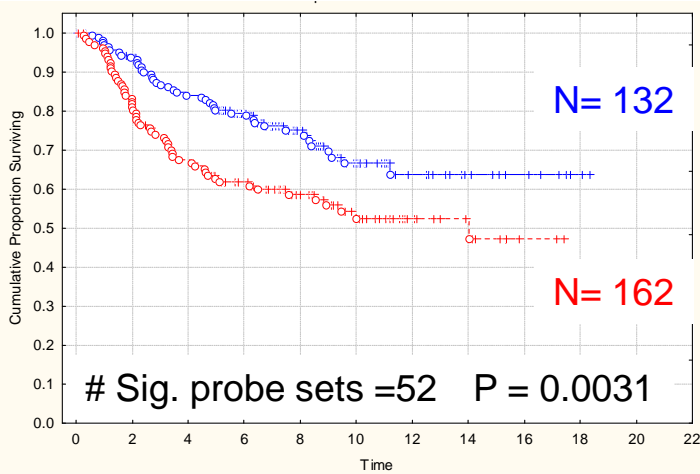

# Figure S4: Bone marrow

## GSE1456: Overall Survival

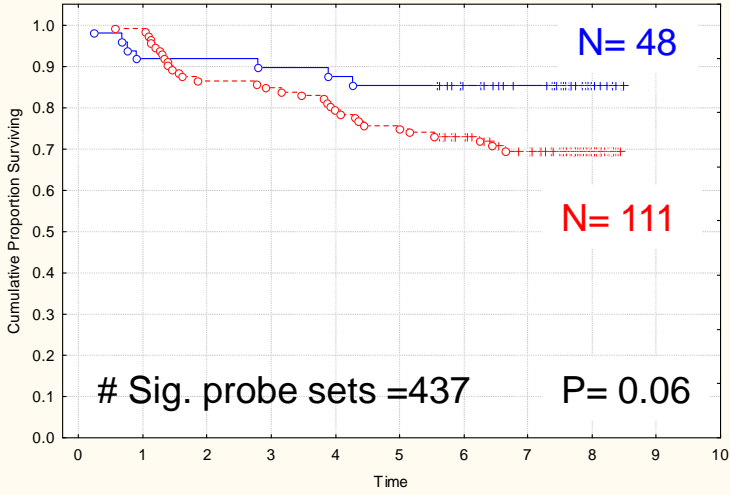

## GSE2034: Distant Metastasis-free Survival

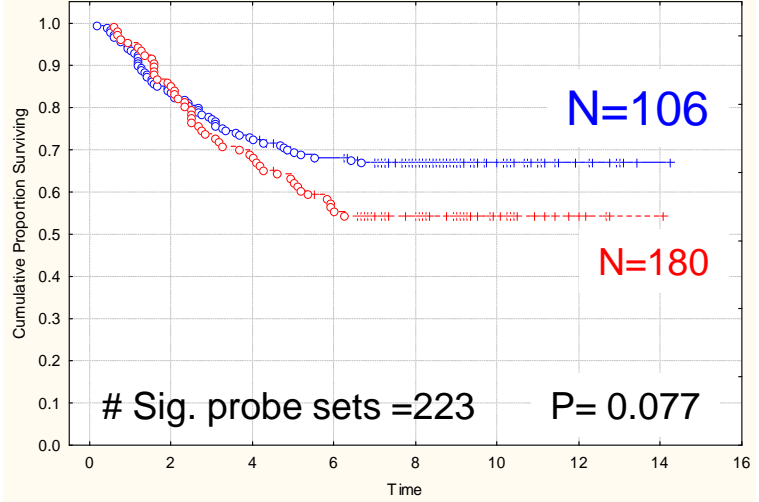

## GSE3494 : Overall Survival

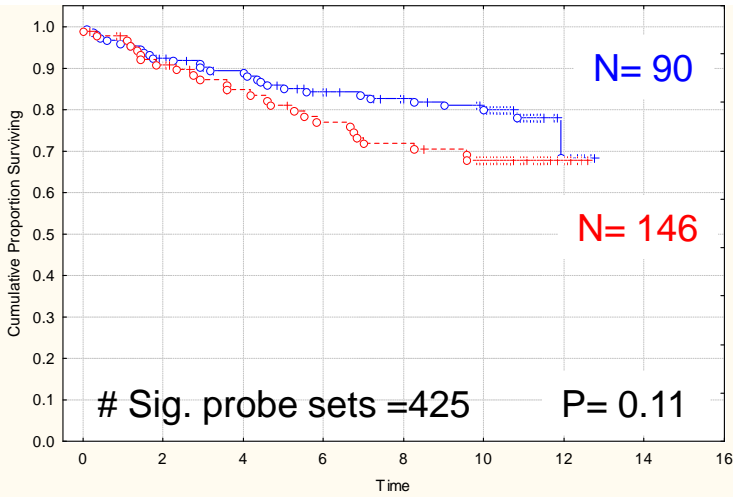

## GSE4922: Disease-free Survival

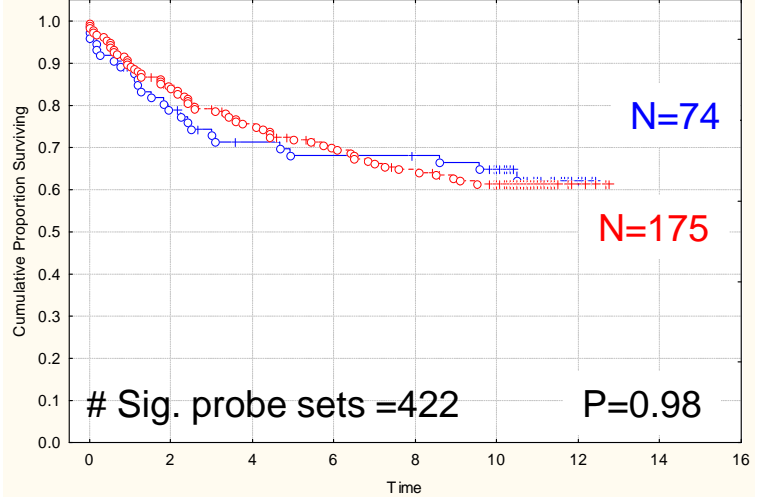

## Rosetta: Metastasis-free survival

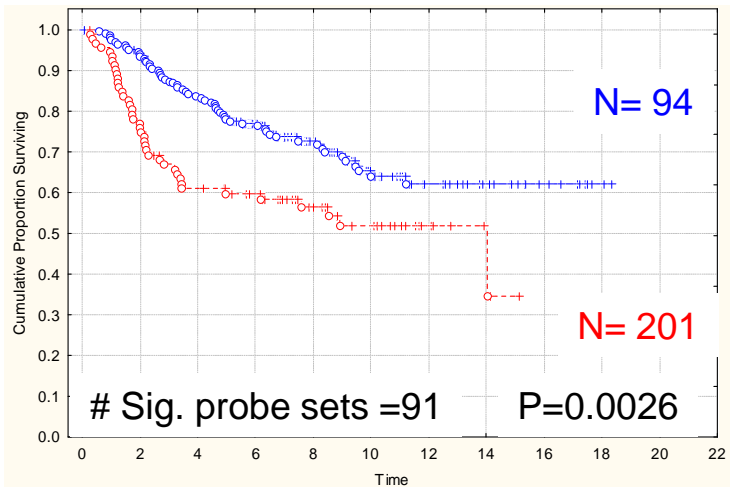

# Figure S5: Biological function analysis of AKR vs DBA and Mvt-1 tumors on the human datasets

A: AKR versus DBA F1 endogenous tumors

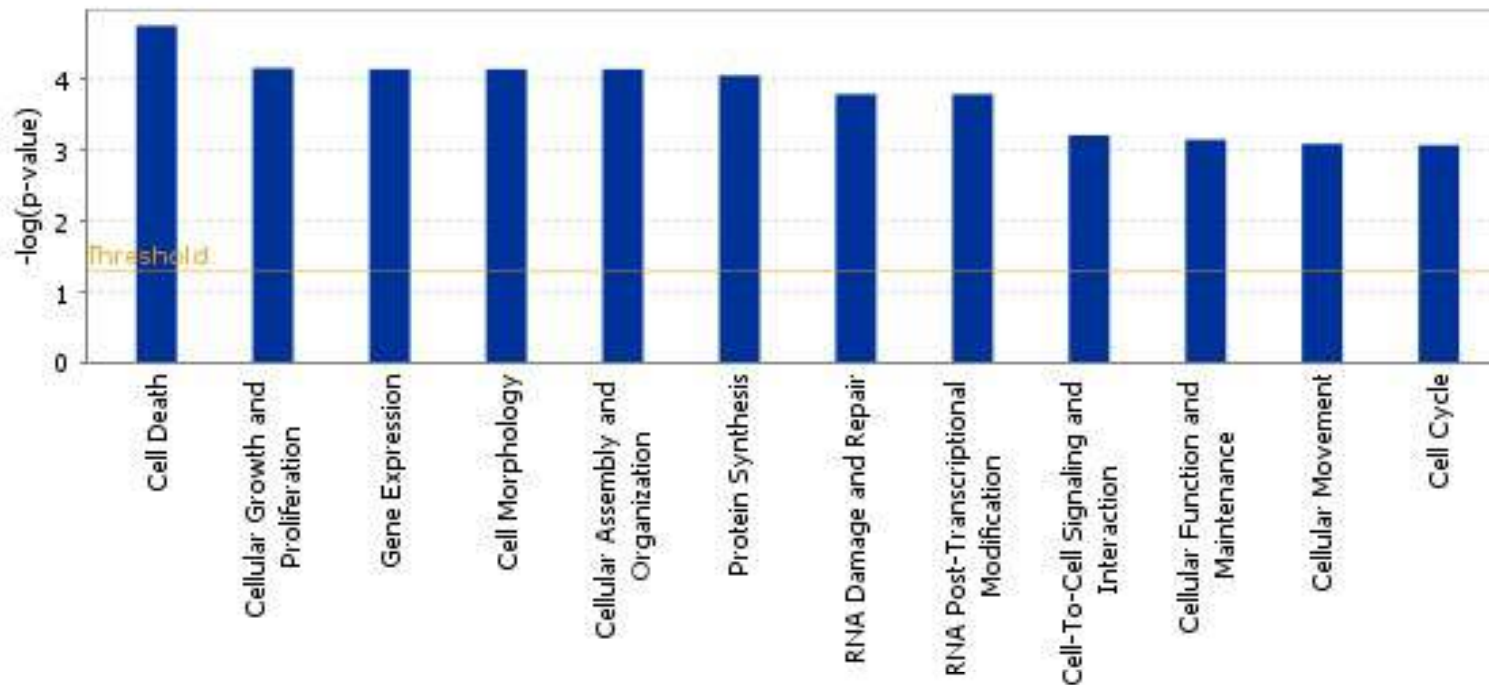

B: Mvt-1 transplant tumors into AKR or DBA F1 hosts

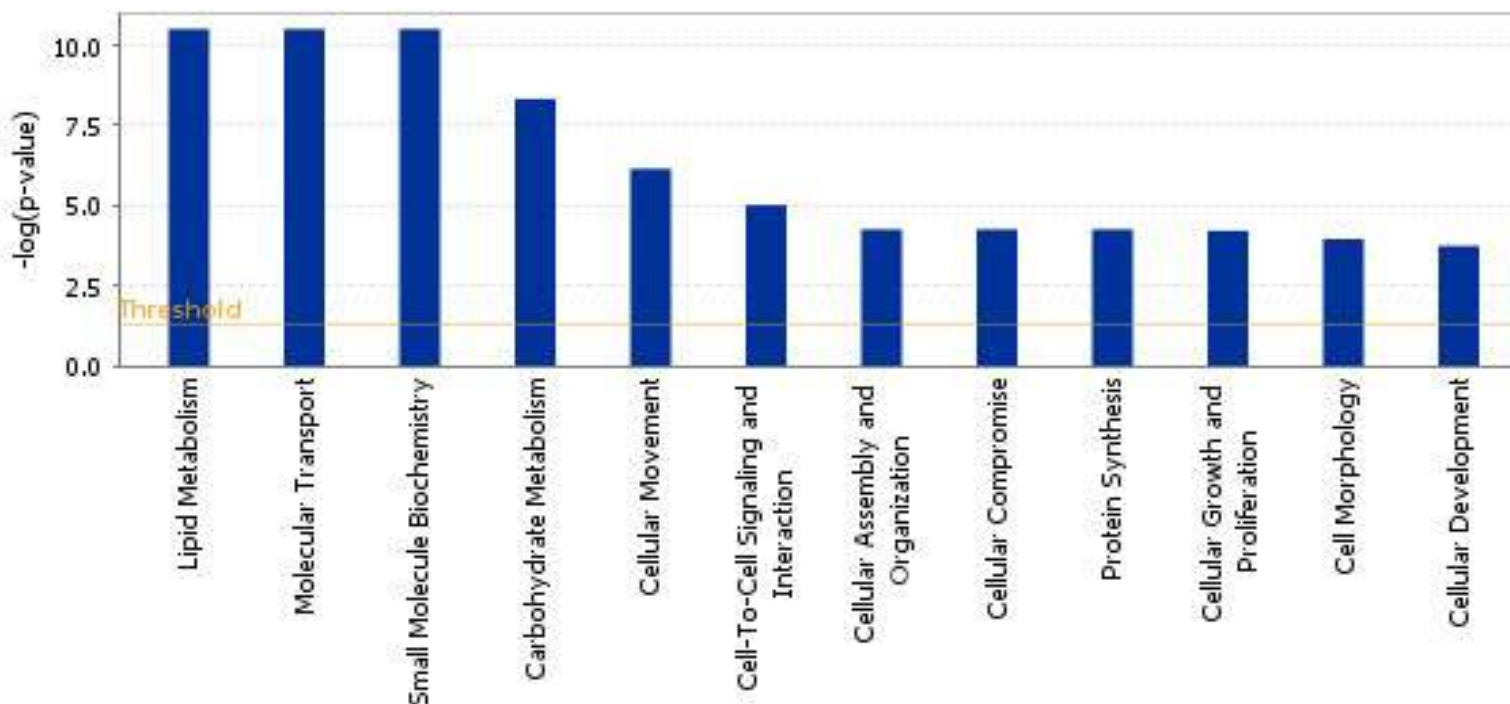

Figure S6: Biological function analysis of normal tissue signatures

Whole blood

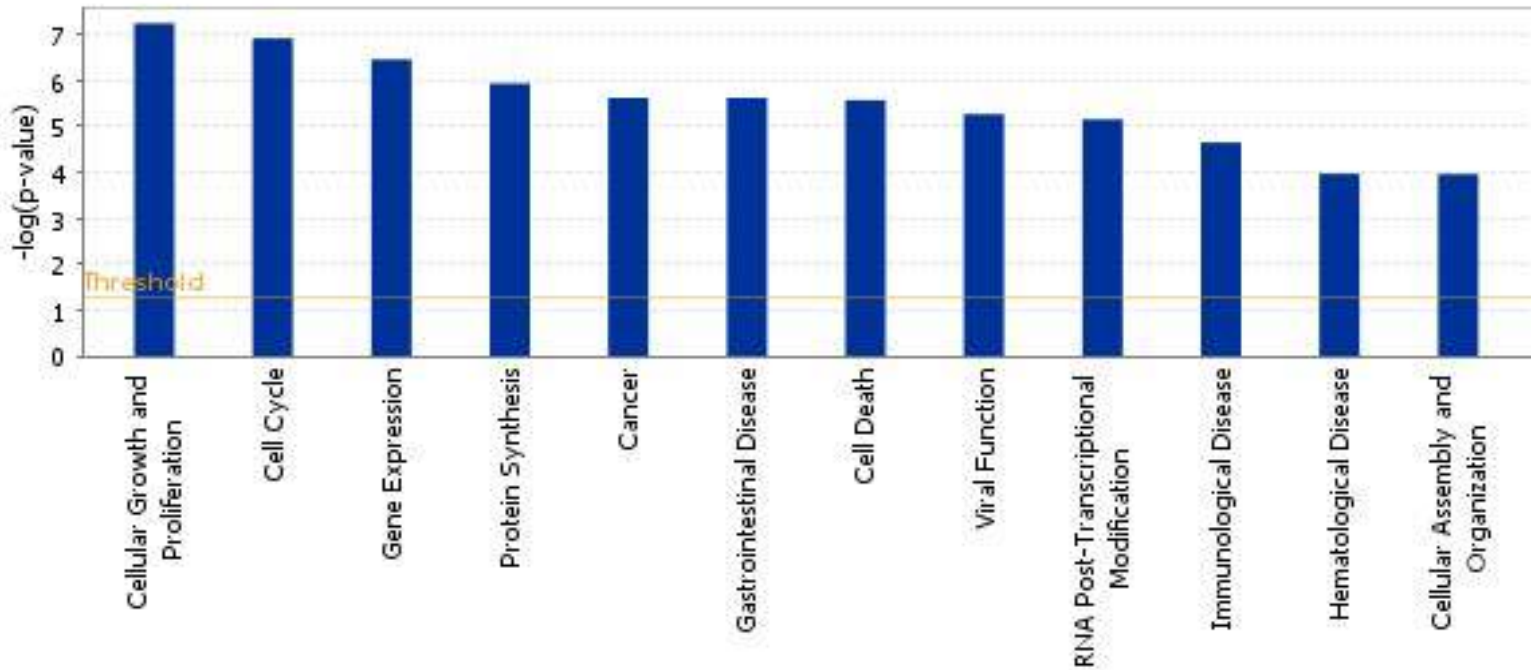

Bone Marrow

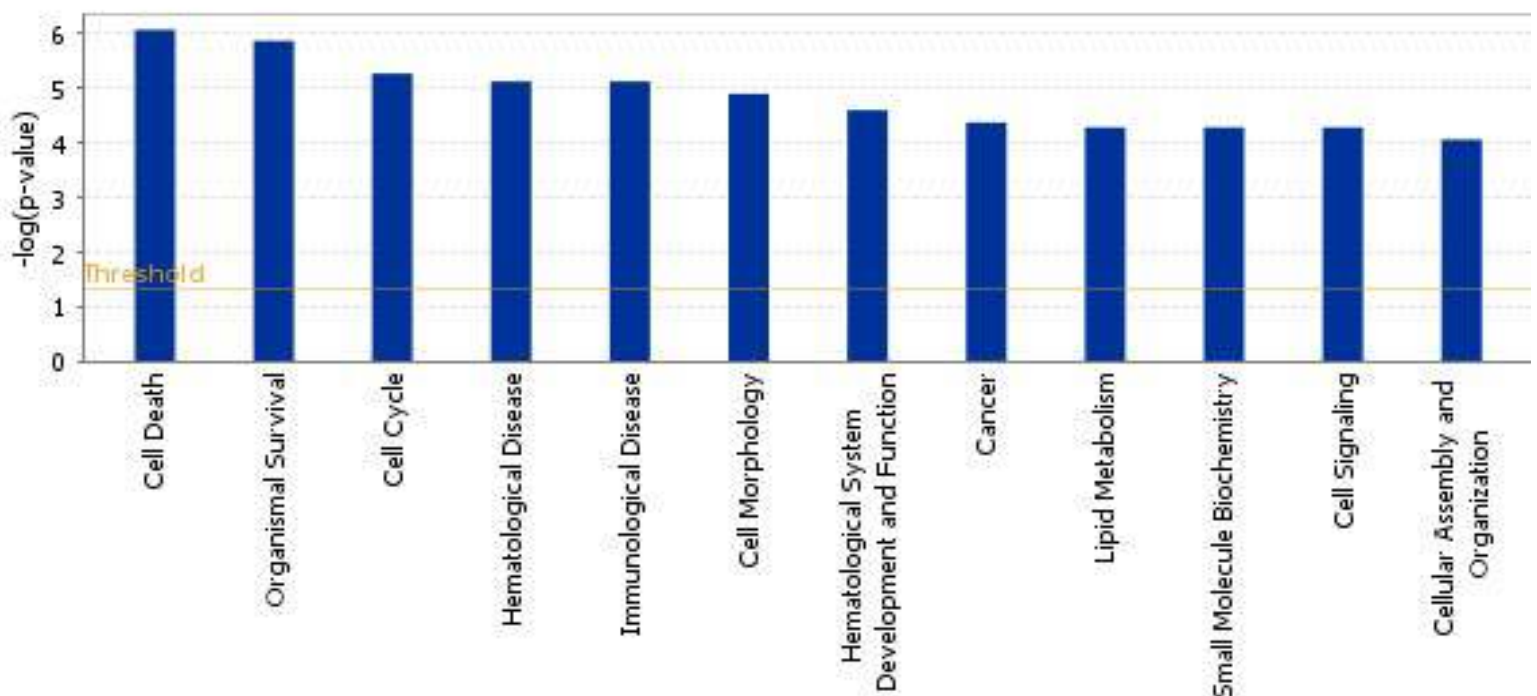

Figure S6 cont.

## Spleen

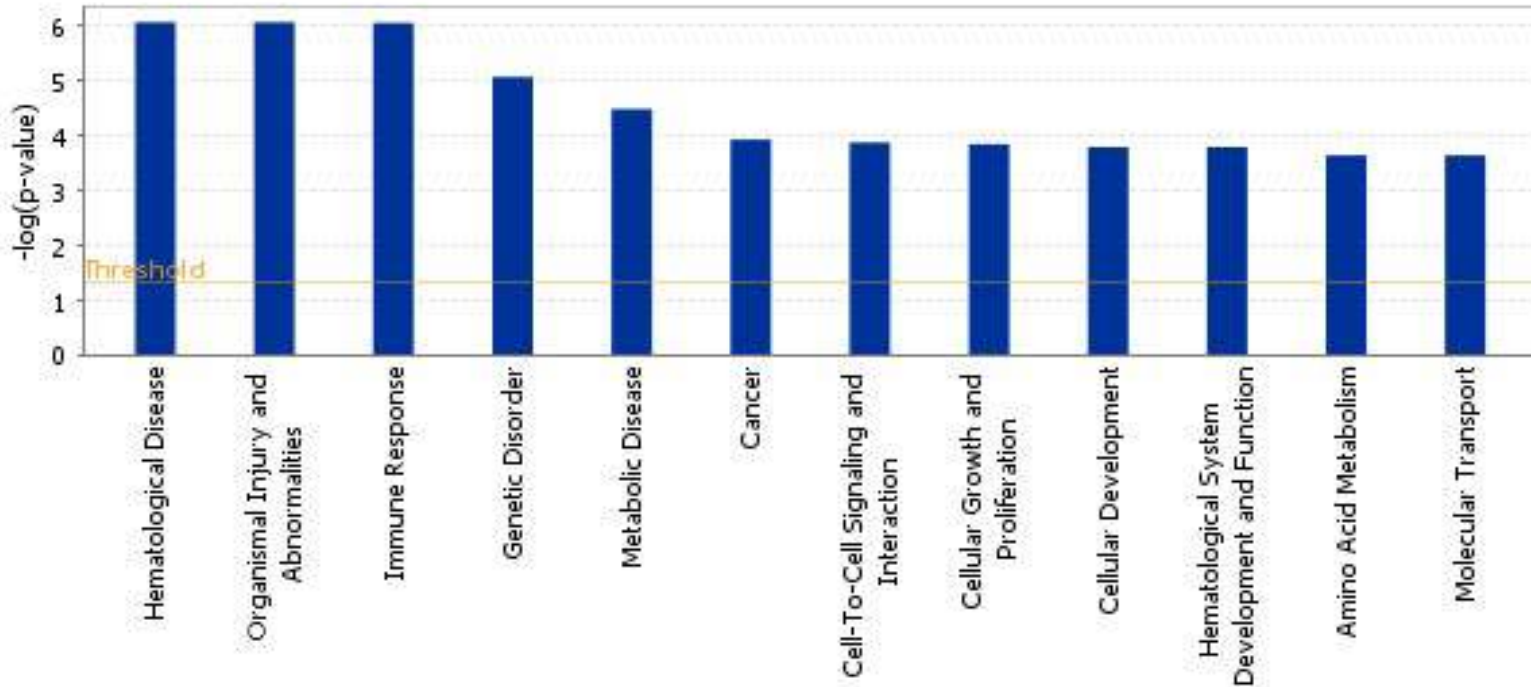

## Thymus

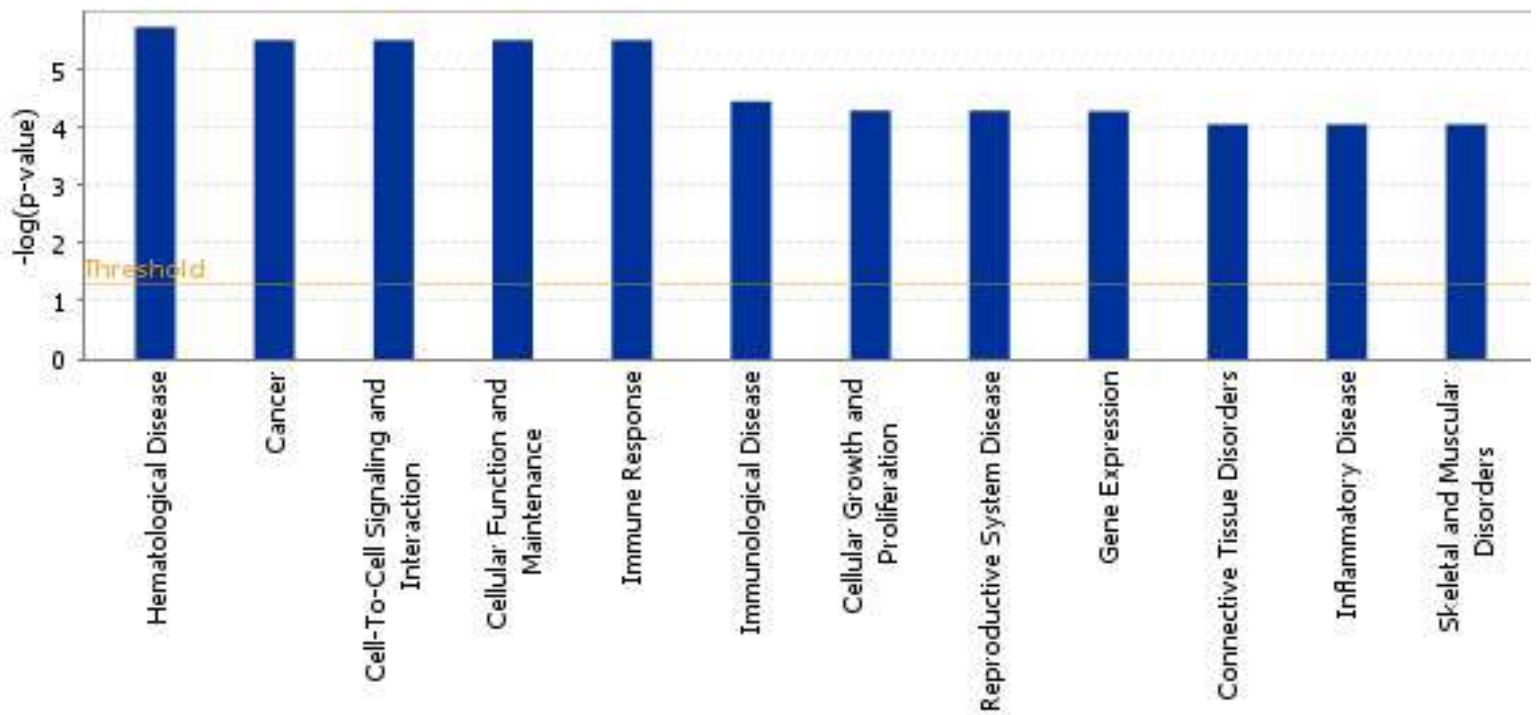

Figure S6 cont.

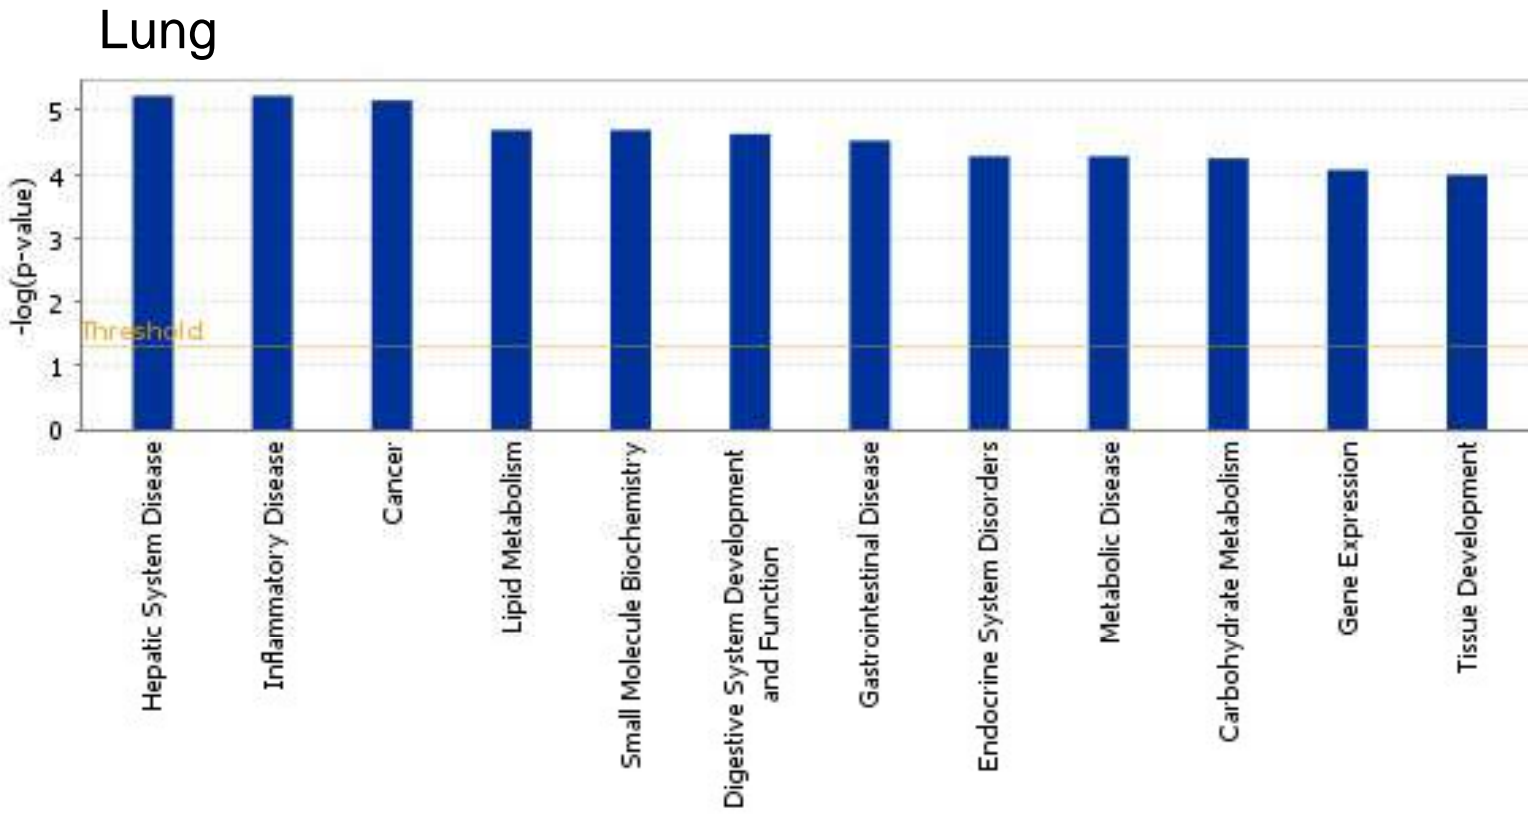



# Figure S7: Lung minus proliferation genes

## GSE1456: Overall Survival

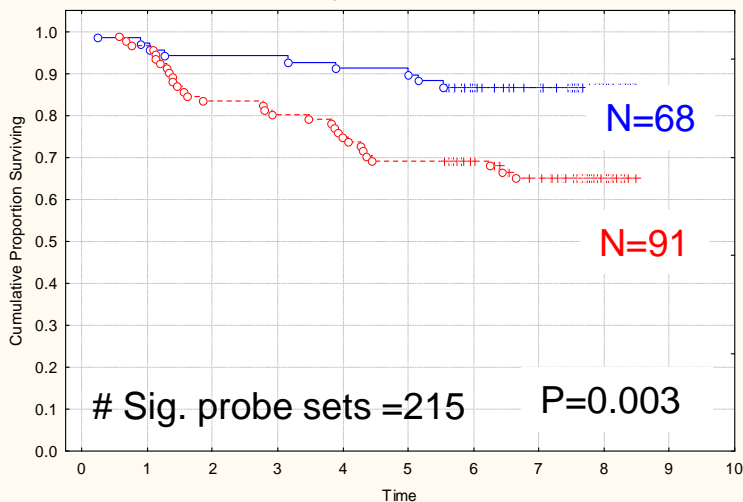

## GSE2034: Distant Metastasis-free Survival

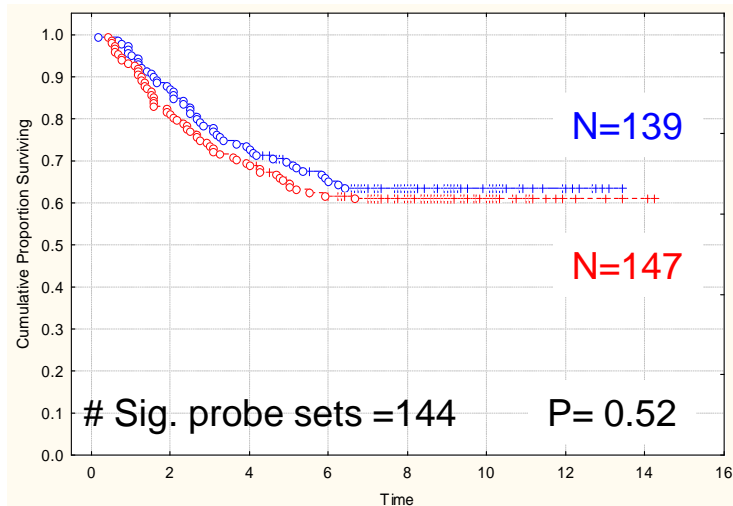

## GSE3494 : Overall Survival

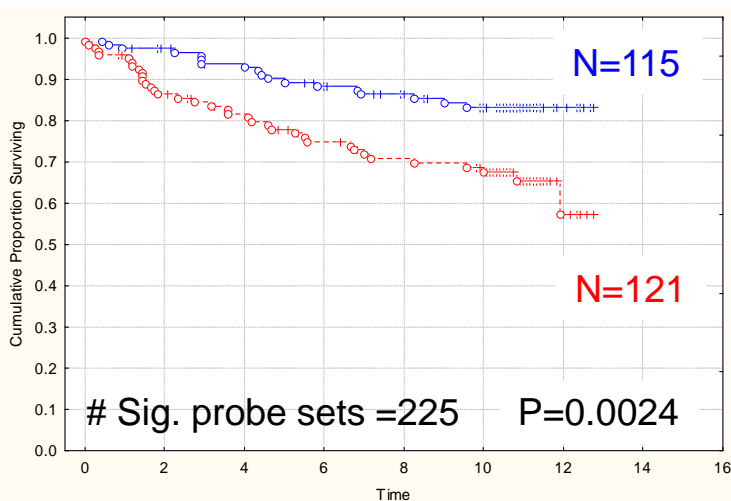

## GSE4922: Disease-free Survival

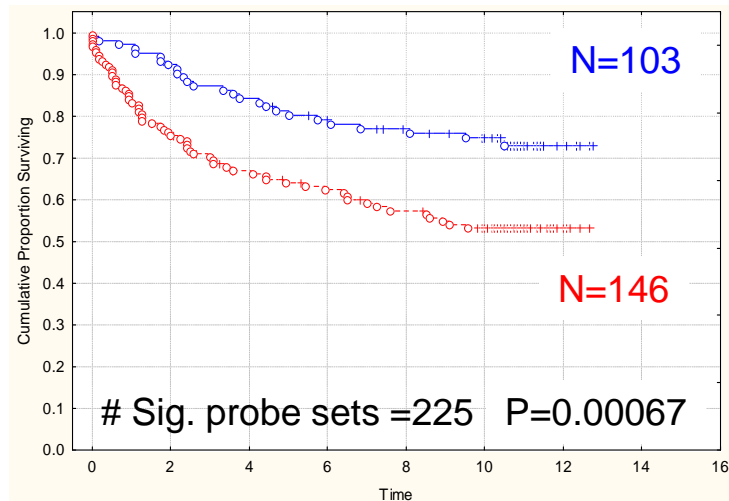

## Rosetta: Metastasis-free survival

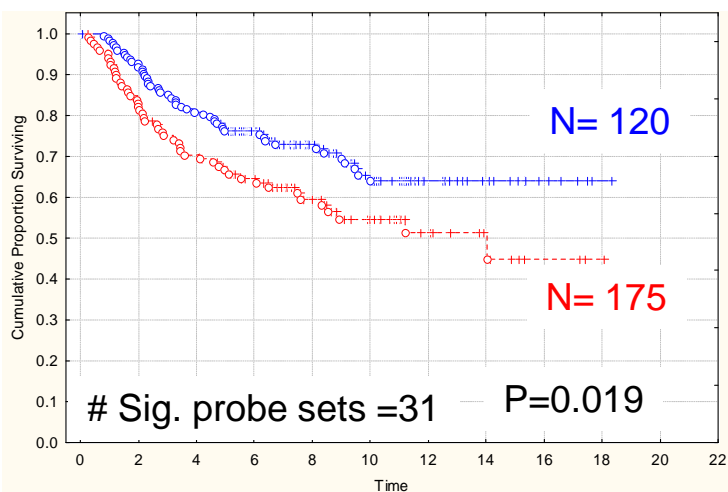

Supplement: NIHMS75738-supplement-1.pdf [file NIHMS75738-supplement-1.pdf]
